# Supplementary material for: Polar and tropical regioisomeric decanuclear cuprofullerenes
Source: Royal Society of Chemistry journal article supplement (doi:10.1039/d4qi02261k), 2024-01-01
Supplement: d4qi02261k1.pdf [file d4qi02261k1.pdf]

*Electronic Supplementary Information (ESI)*

## Polar and Tropical Regioisomeric Decanuclear Cuprofullerenes

Jing-Xuan Sun,<sup>a†</sup> Ting-Ting Zou,<sup>a†</sup> Yi-Chun Zhang,<sup>a</sup> Yu-Li Liu,<sup>a</sup> Li Dang,<sup>a</sup> Shun-Ze Zhan,<sup>\*a</sup>  
Hong Cai,<sup>\*c</sup> Dan Li<sup>\*b</sup>

**Abstract:** Achieving exohedral metallofullerenes (ExMFs) with metal atoms selectively binding at specific spatial positions on the surface of a C<sub>60</sub> molecule remains a considerable challenge. In this study, we report the synthesis of two decanuclear, regioisomeric cuprofullerenes with polar and tropical coordination patterns. Complex **1** features 10 Cu<sup>I</sup> atoms coordinated to the C=C bonds of two polar zones, stabilized by Cl<sup>-</sup> anions and protonated 4-methoxybenzylamine counteranions. Complex **2** involves coordination of 10 Cu<sup>I</sup> atoms in the tropical zone, utilizing trifluoroacetate (**L<sub>F</sub>**) and 5-methylpicolinate (**L<sub>mpic</sub>**) as auxiliary ligands. Notably, complex **2** forms a typical *pcu* topology MOF, linking tropical cuprofullerenes through Cu<sup>II</sup>(**L<sub>mpic</sub>**)<sub>2</sub> units. Theoretical calculations reveal intricate charge transfer processes that significantly influence electronic properties of these cuprofullerenes.

[a] J.-X. Sun, T.-T. Zou, Y.-C. Zhang, Y.-L. Liu, Prof. Dr. L. Dang, Prof. Dr. S.-Z. Zhan  
College of Chemistry and Chemical Engineering, and Key (Guangdong-Hong Kong Joint)  
Laboratory for Preparation and Application of Ordered Structural Materials of Guangdong  
Province  
Shantou University  
Shantou 515063, P. R. China  
E-mail: [szzhan@stu.edu.cn](mailto:szzhan@stu.edu.cn)

[b] Prof. Dr. D. Li  
College of Chemistry and Materials Science and Guangdong Provincial Key Laboratory of  
Supramolecular Coordination Chemistry  
Jinan University  
Guangzhou 510632, P. R. China  
E-mail: [danli@jnu.edu.cn](mailto:danli@jnu.edu.cn)

[c] Prof. Dr. H. Cai,  
School of Chemistry and Environmental Engineering  
Hanshan Normal University  
Chaozhou 521041, P. R. China.  
E-mail: [tiddychen@163.com](mailto:tiddychen@163.com)

<sup>†</sup>J.-X. Sun and T.-T. Zou contributed equally to this work.

## Table of Contents

|                                                                        |    |
|------------------------------------------------------------------------|----|
| 1. Experimental Procedures .....                                       | 2  |
| 1.1 Materials and Physical Measurements .....                          | 2  |
| 1.2 Synthesis.....                                                     | 2  |
| 1.3 Crystal Structural Determination .....                             | 3  |
| 2. Results and Discussion .....                                        | 4  |
| 2.1 Crystal Data.....                                                  | 4  |
| 2.2 Additional Structural Description .....                            | 7  |
| 3. Theoretical Calculation Details.....                                | 10 |
| 3.1 Time Dependent Density Functional Theory (TD-DFT) Calculation..... | 10 |
| 4. References.....                                                     | 20 |

### 1. Experimental Procedures

#### 1.1 Materials and Physical Measurements

Commercially available starting materials and solvents were used without further purification. C<sub>60</sub> (99.5%) was purchased from Xiamen Funano New Material Technology Company LTD without purifications. Thermogravimetric analysis (TGA) was performed on a TA Instruments Q50 Thermogravimetric Analyzer under a nitrogen flow of 40 mL·min<sup>-1</sup> at a heating rate of 20 °C·min<sup>-1</sup>. Powder X-ray diffraction (PXRD) experiment was performed on a MiniFlex 600 X-ray diffractometer of Rigaku Corporation. Infrared spectrum (IR) was obtained in KBr pellet on a Nicolet Avatar 360 FTIR spectrometer in the range of 4000–500 cm<sup>-1</sup>; abbreviations used for the IR bands are: w = weak, m = medium, s = strong, vs = very strong. The diffuse reflectance solid-state UV-Vis spectra of these complexes were obtained on a Lambda950 UV/Vis/NIR spectrophotometer of Perkin Elmer using pure powder sample and pure BaSO<sub>4</sub> as background. X-ray photoelectron spectroscopy (XPS) was performed on a PHI5000 VersaProbe III (ULVAC-PHI, INC).

#### 1.2 Synthesis

**Complex 1:** A mixture of Cu<sub>2</sub>O (8.6 mg, 0.06 mmol), 4-methoxybenzylamine (3.9 μL, 0.03 mmol), HCl (0.10 mmol, 8.5 μL) and C<sub>60</sub> benzene solution (0.0016 mmol, 1.5 mL, 0.75 mg·mL<sup>-1</sup>) were sealed into Pyrex tube with an inner diameter of 8.0 mm and a capacity of 6.0 mL. Then the tube was heated at 80 °C in a programmable oven for

72 h and cooled to room temperature at the rate of  $-2.5\text{ }^{\circ}\text{C}\cdot\text{h}^{-1}$ . Black tinny needle-like crystals were separated mechanically in 15% yields based on  $\text{C}_{60}$ .

**Complex 2:** A mixture of  $\text{Cu}_2\text{O}$  (7.2 mg, 0.05 mmol), methyl 5-methylpicolinate (12.6 mg, 0.083 mmol), trifluoroacetic acid (20  $\mu\text{L}$ , 0.27 mmol,) and  $\text{C}_{60}$  benzene solution (0.0042 mmol, 2.0 mL,  $1.5\text{ mg}\cdot\text{mL}^{-1}$ ) were sealed into Pyrex tube with an inner diameter of 8.0 mm and a capacity of 6.0 mL. Then the tube was heated at  $180\text{ }^{\circ}\text{C}$  in a programmable oven for 72 h and cooled to room temperature at the rate of  $-2.5\text{ }^{\circ}\text{C}\cdot\text{h}^{-1}$ . Black block crystals were separated mechanically in 25% yields based on  $\text{C}_{60}$ .

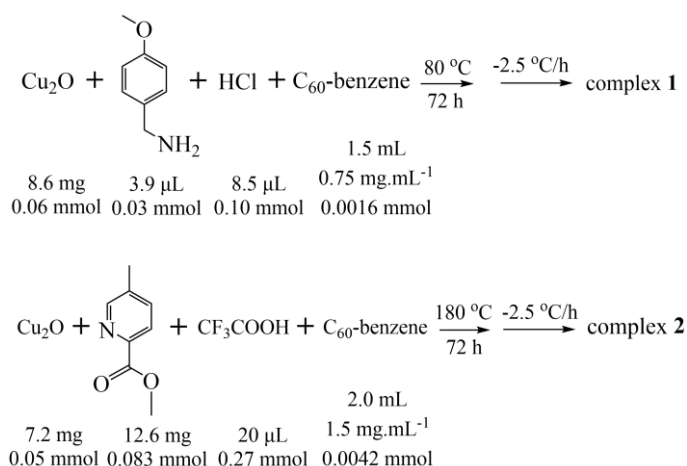

**Scheme S1** Synthesis reactions of the cuprofullerene complexes **1** and **2**.

### 1.3 Crystal Structural Determination

Single crystal X-ray data collection for the materials was performed on a Rigaku OD (Enhance Cu X-ray Source,  $K\alpha$ ,  $\lambda = 1.54184\text{ \AA}$ ) with CCD Plate (XtaLAB Pro: Kappa single) under 100 K. Data were processed with the CrysAlisPro 1.171.39.28b (Rigaku Oxford Diffraction, 2015). Structures were solved by direct methods by ShelXS<sup>[1]</sup> in Olex2 1.2<sup>[2]</sup> and refined on  $F^2$  using full-matrix least-squares (SHELXL-2017/1<sup>[1]</sup> in Olex2 1.2<sup>[2]</sup>). All non-hydrogen atoms were refined with anisotropic thermal parameters. Crystal data and structure refinement for the complexes were summarized in Table S1. Selected bond lengths and angles were given in Table S2-S6.

## 2. Results and Discussion

### 2.1 Crystal Data

**Table S1** Crystal data and structure refinements for the complexes **1** and **2**.

| Complexes                                | <b>1</b>                                                                                            | <b>2</b>                                                                                         |
|------------------------------------------|-----------------------------------------------------------------------------------------------------|--------------------------------------------------------------------------------------------------|
| CCDC                                     | 2300702                                                                                             | 2358411                                                                                          |
| Chemical formula                         | C <sub>148</sub> H <sub>142</sub> Cl <sub>21</sub> Cu <sub>10</sub> N <sub>11</sub> O <sub>16</sub> | C <sub>164</sub> H <sub>78</sub> Cu <sub>13</sub> F <sub>30</sub> N <sub>6</sub> O <sub>32</sub> |
| Formula weight                           | 3710.57                                                                                             | 4040.34                                                                                          |
| Crystal system                           | Triclinic                                                                                           | Triclinic                                                                                        |
| Space group                              | <i>P</i> -1                                                                                         | <i>P</i> -1                                                                                      |
| a (Å)                                    | 12.1936(2)                                                                                          | 15.5866(4)                                                                                       |
| b (Å)                                    | 17.4981(4)                                                                                          | 16.3903(5)                                                                                       |
| c (Å)                                    | 17.5483(3)                                                                                          | 16.9027(4)                                                                                       |
| α (deg)                                  | 101.9784(16)                                                                                        | 103.034(2)                                                                                       |
| β (deg)                                  | 92.5479(13)                                                                                         | 112.931(2)                                                                                       |
| γ (deg)                                  | 96.2693(16)                                                                                         | 99.251(2)                                                                                        |
| V (Å <sup>3</sup> )                      | 3632.07(12)                                                                                         | 3722.69(18)                                                                                      |
| Z                                        | 1                                                                                                   | 1                                                                                                |
| D <sub>calcd</sub> (g·cm <sup>-3</sup> ) | 1.696                                                                                               | 1.802                                                                                            |
| Reflections collected                    | 45731                                                                                               | 38223                                                                                            |
| Unique reflections                       | 14557                                                                                               | 13503                                                                                            |
| R <sub>int</sub>                         | 0.0426                                                                                              | 0.0298                                                                                           |
| GOOF                                     | 1.054                                                                                               | 1.021                                                                                            |
| R <sub>1</sub> <sup>a</sup> [I > 2σ(I)]  | 0.0481                                                                                              | 0.0534                                                                                           |
| wR <sub>2</sub> <sup>b</sup> [I > 2σ(I)] | 0.1166                                                                                              | 0.1435                                                                                           |
| R <sub>1</sub> <sup>a</sup> [all refl.]  | 0.0649                                                                                              | 0.0669                                                                                           |
| wR <sub>2</sub> <sup>b</sup> [all refl.] | 0.1245                                                                                              | 0.1547                                                                                           |

$$^a R_1 = \sum (||F_o| - |F_c||) / \sum |F_o|, \quad ^b wR_2 = [\sum w(F_o^2 - F_c^2)^2 / \sum w(F_o^2)^2]^{1/2}.$$

**Table S2** Selected bond lengths (Å) in complex **1**.

| Bond length (Å) |           |         |           |
|-----------------|-----------|---------|-----------|
| Cu-Cu           |           |         |           |
| Cu1-Cu2         | 3.4641(5) | Cu2-Cu3 | 3.6829(6) |
| Cu3-Cu4         | 3.6495(6) | Cu4-Cu5 | 3.4518(5) |
| Cu1-Cu5         | 3.4788(5) |         |           |
| Cu-Cl           |           |         |           |
| Cu1-Cl1         | 2.3511(1) | Cu1-Cl2 | 2.4218(1) |
| Cu1-Cl6         | 2.2818(2) | Cu2-Cl2 | 2.3820(2) |
| Cu2-Cl3         | 2.3719(1) | Cu2-Cl7 | 2.3047(1) |
| Cu3-Cl3         | 2.3762(1) | Cu3-Cl4 | 2.3604(1) |
| Cu3-Cl8         | 2.2652(1) | Cu4-Cl4 | 2.3948(1) |
| Cu4-Cl5         | 2.4006(1) | Cu4-Cl9 | 2.2745(1) |
| Cu5-Cl11        | 2.3708(2) | Cu5-Cl5 | 2.4132(1) |
| Cu5-Cl10        | 2.2455(5) |         |           |
| Cu-C            |           |         |           |
| Cu1-C21         | 2.134(4)  | Cu1-C22 | 2.061(4)  |
| Cu2-C25         | 2.082(3)  | Cu2-C30 | 2.146(4)  |
| Cu3-C28         | 2.043(3)  | Cu3-C29 | 2.194(3)  |
| Cu4-C18         | 2.072(3)  | Cu4-C19 | 2.135(3)  |
| Cu5-C3          | 2.042(3)  | Cu5-C20 | 2.096(3)  |

| C=C (coordinated hexagons) |          |         |          |
|----------------------------|----------|---------|----------|
| (6,6)                      |          |         |          |
| C21-C22                    | 1.418(5) | C25-C30 | 1.423(5) |
| C28-C29                    | 1.420(5) | C18-C19 | 1.420(5) |
| C3-C20                     | 1.433(5) |         |          |

**Table S3** Selected Cl...H distances (Å) in complex **1**.

|          |           |          |           |
|----------|-----------|----------|-----------|
| Cl9-H6C  | 2.5010(4) | Cl8-H6B  | 2.9332(5) |
| Cl8-H5B  | 2.3600(4) | Cl8-H2C  | 2.4595(4) |
| Cl7-H3B  | 2.6222(4) | Cl7-H3A  | 2.3883(4) |
| Cl6-H3C  | 2.4342(4) | Cl6-H1C  | 2.3360(3) |
| Cl5-H6C  | 2.8703(4) | Cl5-H4C  | 2.5268(4) |
| Cl4-H5B  | 2.8021(4) | Cl4-H4A  | 2.5611(4) |
| Cl3-H4A  | 2.8118(4) | Cl3-H2C  | 2.8142(4) |
| Cl2-H4B  | 2.4453(4) | Cl2-H3B  | 2.7670(4) |
| Cl11-H6A | 2.3723(4) | Cl11-H5C | 2.3738(4) |
| Cl10-H6B | 2.4041(4) | Cl10-H2A | 2.5064(4) |
| Cl1-H2A  | 2.8258(4) |          |           |

**Table S4** Selected bond angles (°) in complex **1**.

| Bond angle (°) |            |              |            |
|----------------|------------|--------------|------------|
| Cl-Cu-Cl       |            |              |            |
| Cl1-Cu1-Cl2    | 98.26(4)   | Cl6-Cu1-Cl1  | 106.16(4)  |
| Cl6-Cu1-Cl2    | 105.30(5)  | Cl3-Cu2-Cl2  | 102.70(4)  |
| Cl7-Cu2-Cl2    | 98.60(4)   | Cl7-Cu2-Cl3  | 109.03(4)  |
| Cl4-Cu3-Cl3    | 109.92(4)  | Cl8-Cu3-Cl3  | 108.17(4)  |
| Cl8-Cu3-Cl4    | 103.50(4)  | Cl4-Cu4-Cl5  | 100.19(4)  |
| Cl9-Cu4-Cl4    | 109.35(4)  | Cl9-Cu4-Cl5  | 100.73(4)  |
| Cl1-Cu5-Cl5    | 97.18(4)   | Cl10-Cu5-Cl1 | 103.90(4)  |
| Cl10-Cu5-Cl5   | 104.76(4)  |              |            |
| C-Cu-Cl        |            |              |            |
| C21-Cu1-Cl1    | 102.51(10) | C21-Cu1-Cl2  | 99.44(9)   |
| C21-Cu1-Cl6    | 138.54(10) | C22-Cu1-Cl1  | 121.33(10) |
| C22-Cu1-Cl2    | 124.56(10) | C22-Cu1-Cl6  | 99.32(11)  |
| C25-Cu2-Cl2    | 126.90(10) | C25-Cu2-Cl3  | 113.97(10) |
| C25-Cu2-Cl7    | 103.80(10) | C30-Cu2-Cl2  | 100.78(10) |
| C30-Cu2-Cl3    | 98.15(10)  | C30-Cu2-Cl7  | 142.01(10) |
| C28-Cu3-Cl3    | 115.51(11) | C28-Cu3-Cl4  | 118.33(10) |
| C28-Cu3-Cl8    | 99.62(10)  | C29-Cu3-Cl3  | 96.83(10)  |
| C29-Cu3-Cl4    | 98.10(9)   | C29-Cu3-Cl8  | 138.51(10) |
| C18-Cu4-Cl4    | 115.30(10) | C18-Cu4-Cl5  | 126.71(10) |
| C18-Cu4-Cl9    | 103.07(11) | C19-Cu4-Cl4  | 98.40(9)   |
| C19-Cu4-Cl5    | 99.91(10)  | C19-Cu4-Cl9  | 141.54(10) |
| C3-Cu5-Cl1     | 122.13(11) | C3-Cu5-Cl5   | 125.77(10) |
| C3-Cu5-Cl10    | 100.40(10) | C20-Cu5-Cl1  | 102.92(11) |
| C20-Cu5-Cl5    | 99.79(9)   | C20-Cu5-Cl10 | 140.69(10) |
| C-Cu-C         |            |              |            |
| C22-Cu1-C21    | 39.48(13)  | C25-Cu2-C30  | 39.29(13)  |
| C28-Cu3-C29    | 38.97(14)  | C18-Cu4-C19  | 39.42(14)  |
| C3-Cu5-C20     | 40.48(13)  |              |            |

**Table S5** Selected bond lengths (Å) in complex **2**.

| Bond length (Å)            |            |         |           |
|----------------------------|------------|---------|-----------|
| Cu-Cu                      |            |         |           |
| Cu1-Cu2                    | 3.4860(7)  | Cu2-Cu3 | 3.0814(7) |
| Cu3-Cu4                    | 3.6666(8)  | Cu4-Cu5 | 3.0798(7) |
| Cu1-Cu5                    | 3.4860(7)  |         |           |
| Cu-O                       |            |         |           |
| Cu1-O1                     | 1.9614(4)  | Cu1-O11 | 1.9538(7) |
| Cu1-O13                    | 2.2742(4)  | Cu2-O3  | 1.9981(4) |
| Cu2-O5                     | 1.9539(3)  | Cu2-O13 | 2.2004(3) |
| Cu3-O4                     | 1.9461(2)  | Cu3-O6  | 2.2885(9) |
| Cu3-O15                    | 2.02546(1) | Cu4-O7  | 1.9999(1) |
| Cu4-O9                     | 1.9666(4)  | Cu4-O16 | 2.4667(5) |
| Cu5-O8                     | 1.9828(3)  | Cu5-O10 | 2.2379(6) |
| Cu5-O2                     | 1.9826(4)  | Cu6-O12 | 1.9450(1) |
| Cu7-O16                    | 1.9444(9)  | Cu8-O14 | 1.9124(1) |
| Cu-N                       |            |         |           |
| Cu6-N1                     | 1.9629(2)  | Cu7-N3  | 1.9566(1) |
| Cu8-N2                     | 1.9481(1)  |         |           |
| Cu-C                       |            |         |           |
| Cu1-C1                     | 2.0025(5)  | Cu1-C2  | 2.0043(9) |
| Cu2-C20                    | 1.9693(4)  | Cu2-C21 | 2.0529(4) |
| Cu3-C24                    | 1.9886(4)  | Cu3-C30 | 2.0405(1) |
| Cu4-C25                    | 2.0656(4)  | Cu4-C26 | 1.9655(4) |
| Cu5-C10                    | 2.0264(8)  | Cu5-C11 | 2.0160(6) |
| C-C (coordinated hexagons) |            |         |           |
| C1-C2                      | 1.4298(3)  | C20-C21 | 1.4204(3) |
| C24-C30                    | 1.4369(3)  | C25-C26 | 1.4273(3) |
| C10-C11                    | 1.4354(3)  |         |           |

**Table S6** Selected bond angles (°) in complex **2**.

|               |            |                |            |
|---------------|------------|----------------|------------|
| O-Cu-O        |            |                |            |
| O1-Cu1-O13    | 92.45(11)  | O11-Cu1-O1     | 104.56(13) |
| O11-Cu1-O1    | 104.56(13) | O11-Cu1-O13    | 85.57(12)  |
| O3-Cu2-O13    | 92.24(12)  | O5-Cu2-O3      | 101.47(17) |
| O5-Cu2-O13    | 99.81(12)  | O4-Cu3-O6      | 99.02(13)  |
| O4-Cu3-O15    | 98.97(12)  | O15-Cu5-O6     | 83.48(11)  |
| O16-Cu6-O16#3 | 180.0      | O7-Cu4-O9      | 97.34(13)  |
| O8-Cu5-O10    | 96.14(13)  |                |            |
| O-Cu-N        |            |                |            |
| O12-Cu1-N1    | 84.02(13)  | O12-Cu1-N1#1   | 95.98(13)  |
| O12#1-Cu1-N1  | 95.98(13)  | O12#1-Cu1-N1#1 | 84.02(13)  |
| O14-Cu3-N2    | 84.65(14)  | O14-Cu3-N2#2   | 95.35(14)  |
| O14#2-Cu3-N2  | 95.35(14)  | O14#2-Cu3-N2#2 | 84.65(14)  |
| O16-Cu6-N3    | 83.25(13)  | O16-Cu6-N3#3   | 96.75(13)  |
| O16#3-Cu6-N3  | 96.75(13)  | O16#3-Cu6-N3#3 | 83.25(13)  |
| O-Cu-C        |            |                |            |
| O1-Cu2-C1     | 109.34(15) | O11-Cu2-C2     | 103.16(15) |
| O13-Cu2-C1    | 103.39(14) | O13-Cu4-C20    | 103.47(14) |
| O13-Cu4-C21   | 97.43(13)  | O3-Cu4-C20     | 102.96(16) |
| O5-Cu4-C21    | 110.55(17) | O4-Cu5-C30     | 105.84(15) |
| O6-Cu5-C24    | 103.71(14) | O15-Cu5-C30    | 144.48(14) |
| O15-Cu5-C24   | 107.53(14) | O7-Cu7-C26     | 105.56(14) |
| O9-Cu7-C25    | 113.91(15) | O8-Cu8-C11     | 104.50(14) |
| O10-Cu8-C10   | 104.10(15) |                |            |
| C-N-Cu        |            |                |            |
| C42-N1-Cu1    | 111.8(3)   | C49-N2-Cu3     | 111.4(3)   |
| C56-N3-Cu6    | 112.1(3)   |                |            |

| C-Cu-C                                                                    |           |             |           |
|---------------------------------------------------------------------------|-----------|-------------|-----------|
| C1-Cu2-C2                                                                 | 41.82(17) | C20-Cu4-C21 | 41.30(16) |
| C24-Cu5-C30                                                               | 41.76(16) | C25-Cu7-C26 | 41.39(16) |
| C10-Cu8-C11                                                               | 41.60(16) |             |           |
| C-O-Cu                                                                    |           |             |           |
| C31-O1-Cu2                                                                | 124.8(3)  | C41-O11-Cu2 | 127.8(3)  |
| C48-O13-Cu2                                                               | 119.2(3)  | C33-O3-Cu4  | 129.4(3)  |
| C33-O4-Cu5                                                                | 111.5(3)  | C55-O15-Cu5 | 110.4(3)  |
| C37-O7-Cu7                                                                | 125.7(3)  | C39-O9-Cu7  | 109.9(3)  |
| Symmetry codes                                                            |           |             |           |
| #1: 2-x, 2-y, 2-z; #2: 1-x, 2-y, 1-z; #3: 1-x, 1-y, -z; #4: 1-x, 1-y, 1-z |           |             |           |

## 2.2 Additional Structural Description

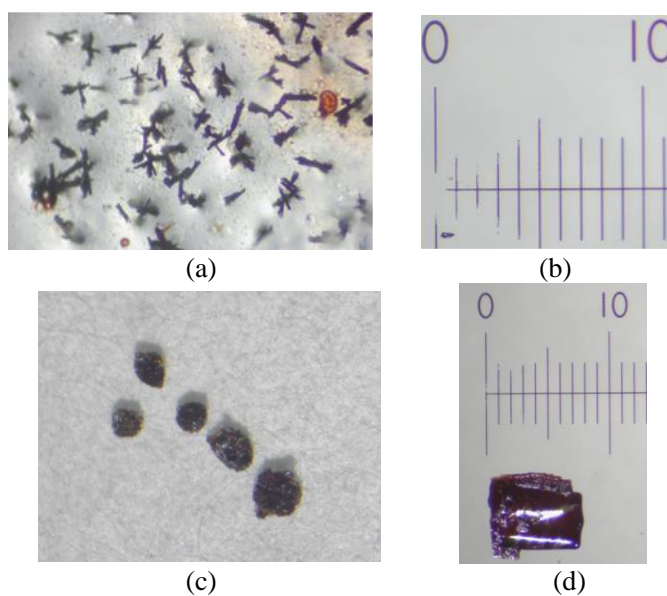

**Fig. S1** Crystal images of cuprofullerene complexes **1** (ab) and **2** (cd) amplified 40 times under a microscope. (bd) Crystal images on a scale with the minimum scale of 0.1 mm.

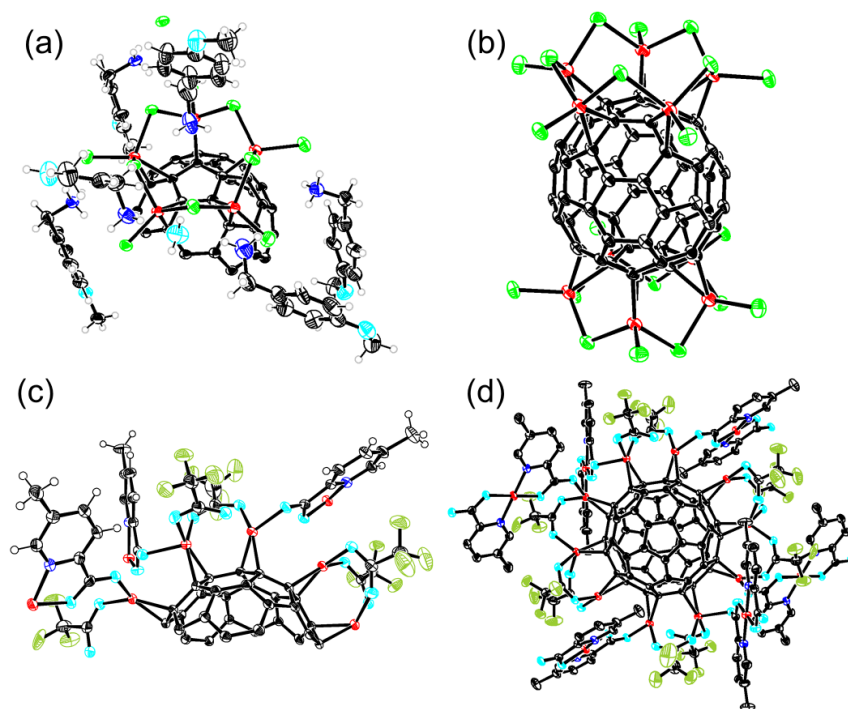

**Fig. S2** Asymmetrical units (left, ac) and fragment structures (right, bd) of the complex **1** (ab) and **2** (cd) with 50% thermal ellipsoid. (Color code: red, Cu; green, Cl; black, C; blue, N; cyan, O; yellow green, F.)

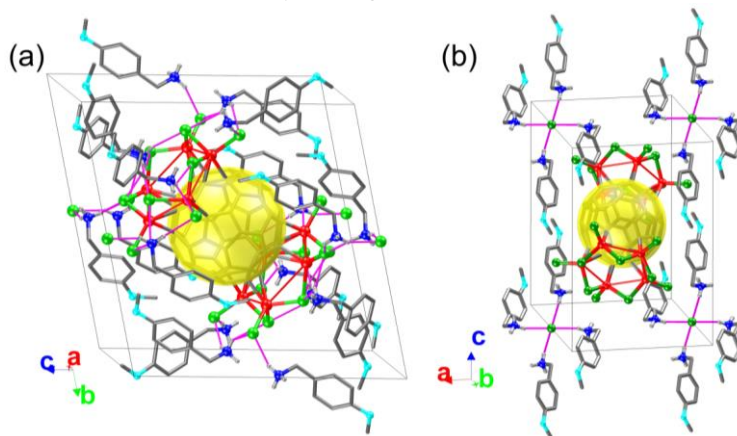

**Fig. S3** H...Cl weak interactions (pink line) between  $\text{-NH}_3^+$  cations and coordinating Cl (a) and crystallized Cl (b) anions. (Color code: red, Cu; green, Cl; black, C; blue, N; cyan, O; H, grey.)

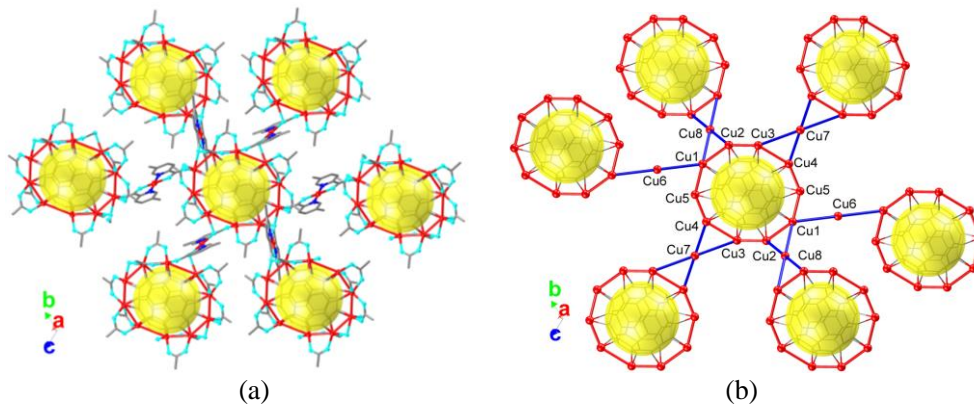



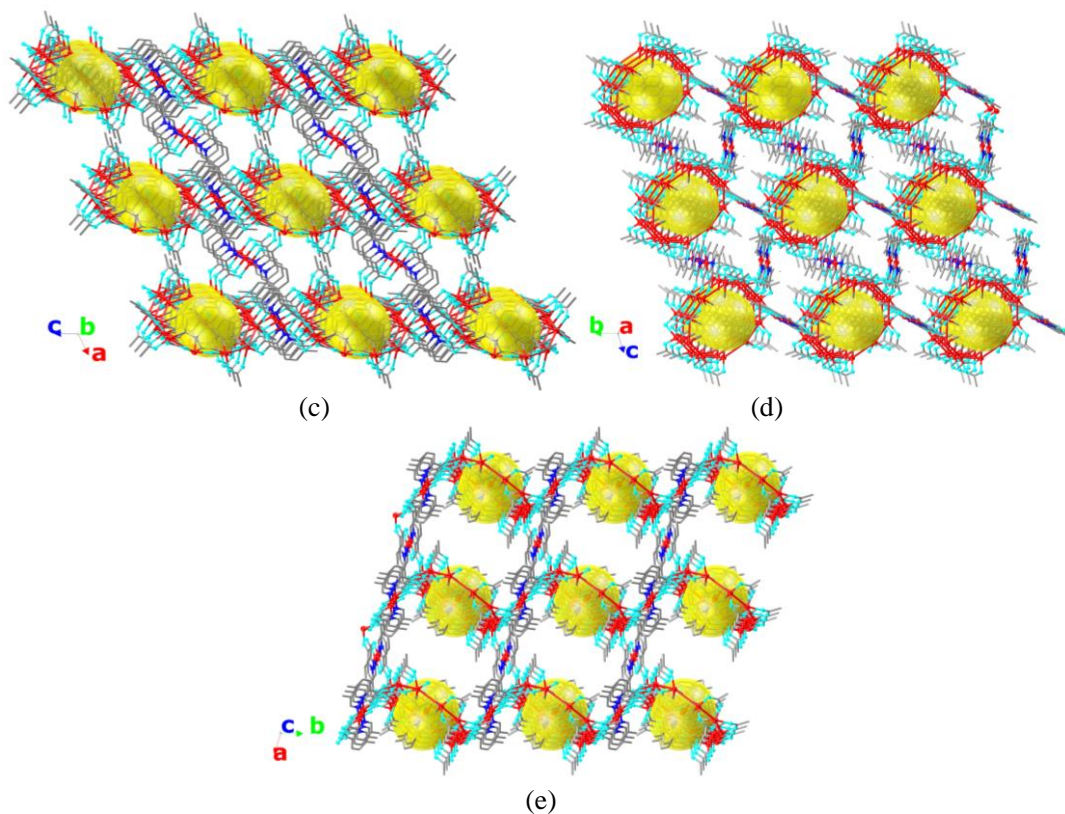

**Fig. S4** 3D packing structures of complex **2** showing the connection between the decanuclear tropic cuprofullerenes (ab) and the vacant space (c-e) along  $a$ ,  $b$  and  $c$  axis. The crystallized benzene molecules are omitted for clarity.

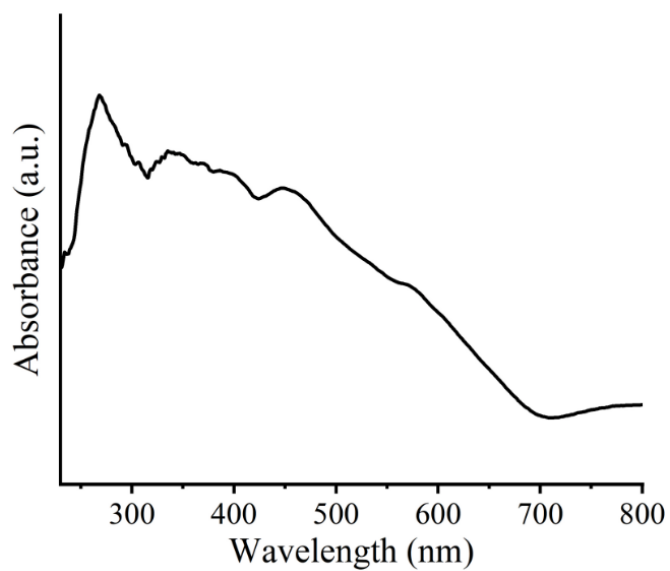

**Fig. S5** Diffuse reflectance solid-state UV-Vis spectra of complex **2**.

### 3. Theoretical Calculation Details

#### 3.1 Time Dependent Density Functional Theory (TD-DFT) Calculation

As shown in Fig. S6, the calculated models of the decanuclear cuprofullerene units were selected from the crystal structures with chemical composition of  $[(\text{Cu}^{\text{I}}_5\text{Cl}_{10})(\text{C}_{60})(\text{Cu}^{\text{I}}_5\text{Cl}_{10})]^{10-} \cdot 10(\text{C}_8\text{H}_{12}\text{NO})^+$  (complex **1**, Fig. S6a) and  $\text{Cu}^{\text{I}}_{10}\text{C}_{60}(\text{CF}_3\text{COO})_{10}(\text{C}_7\text{H}_7\text{NO}_2)_6$  (complex **2**, Fig. S6b). All the calculations were carried out with Gaussian 16 software package.<sup>[8]</sup> No optimization was performed for the calculated model. The exact-exchange-incorporated PBE0 hybrid functional<sup>[9]</sup> was employed throughout with LANDL2DZ basis set<sup>[10]</sup> for Cu atoms, 6-31G\* basis set for C, O, N, F, H and Cl.<sup>[11]</sup> To perform wavefunction analysis, some of the out files were used as input files of Multiwfn software packages.<sup>[12]</sup> Electron density difference (EDD) maps could be obtained to provide accurate assignments of excited states by calculating singlet-singlet spin-allowed transitions. Orbital contributions for the selected excited states and orbital composition analysis with Hirshfeld method were all analyzed by Multiwfn software packages.<sup>[12]</sup>

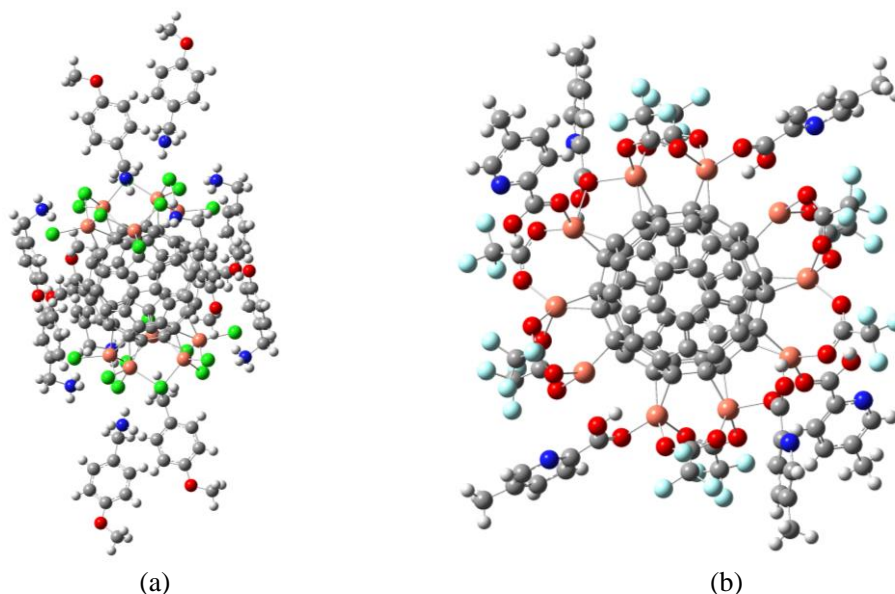

**Fig. S6** The calculated decanuclear cuprofullerene model with chemical composition of  $[(\text{Cu}^{\text{I}}_5\text{Cl}_{10})(\text{C}_{60})(\text{Cu}^{\text{I}}_5\text{Cl}_{10})]^{10-} \cdot 10(\text{C}_8\text{H}_{12}\text{NO})^+$  (complex **1**, a) and  $\text{Cu}^{\text{I}}_{10}\text{C}_{60}(\text{CF}_3\text{COO})_{10}(\text{C}_7\text{H}_7\text{NO}_2)_6$  (complex **2**, b).

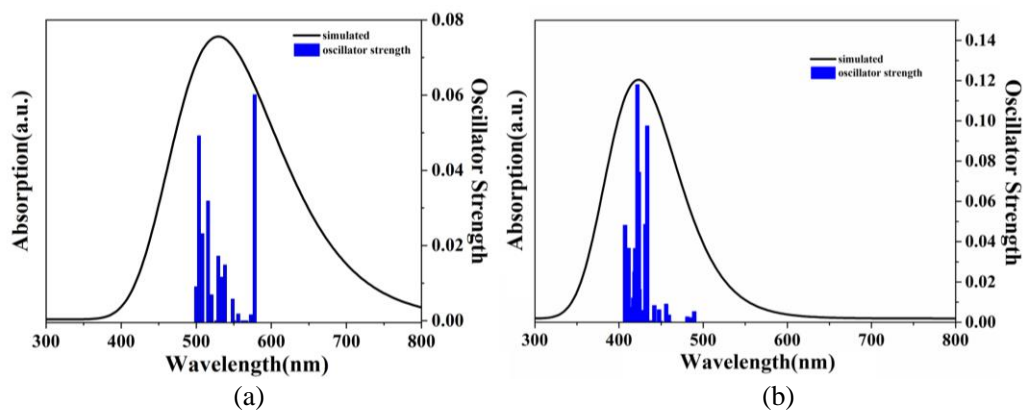

**Fig. S7** The calculated absorptions for the model of complexes **1** (a) and **2** (b).

**Table S7** The calculated electron density difference (EDD) and the orbital transitions of the vertical singlet excited for complex **1** (isovalue = 0.02).

| No. | E(eV)  | $\lambda$ (nm) | $f$     | EDD                                                                                 | Major transitions and contributions<br>(H = HOMO, L = LUMO) |
|-----|--------|----------------|---------|-------------------------------------------------------------------------------------|-------------------------------------------------------------|
| 1   | 1.8830 | 658.44         | 0.00000 | 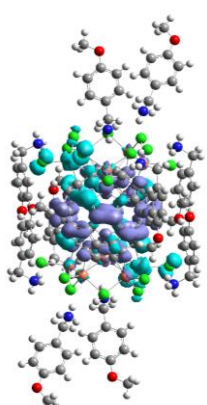  | H $\rightarrow$ L 86.3%                                     |
| 8   | 2.1450 | 578.01         | 0.06010 |  | H-3 $\rightarrow$ L 85.4%,<br>H-4 $\rightarrow$ L 5.6%      |

|    |        |        |         |                                                                                     |                                                                                                              |
|----|--------|--------|---------|-------------------------------------------------------------------------------------|--------------------------------------------------------------------------------------------------------------|
| 16 | 2.3034 | 538.27 | 0.01480 | 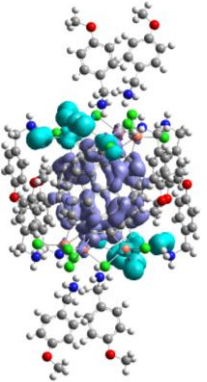   | H-4 → L+1 34.3%,<br>H-3 → L+1 32.7%,<br>H-6 → L 10.9%,<br>H-4 → L 7.5%                                       |
| 19 | 2.3222 | 533.91 | 0.01160 |    | H-3 → L+2 71.0%,<br>H-6 → L+1 7.2%                                                                           |
| 20 | 2.3431 | 529.15 | 0.01720 |   | H-9 → L 27.2%,<br>H-10 → L 13.7%,<br>H-6 → L+1 12.1%,<br>H-6 → L 11.5%,<br>H-3 → L+1 8.3%,<br>H-6 → L+2 7.0% |
| 25 | 2.4056 | 515.40 | 0.03190 |  | H-9 → L 38.3%,<br>H-10 → L 24.7%,<br>H-6 → L+1 10.6%,<br>H-3 → L+2 7.3%,<br>H-9 → L+1 5.2%                   |

|    |        |        |         |                                                                                    |                                                                           |
|----|--------|--------|---------|------------------------------------------------------------------------------------|---------------------------------------------------------------------------|
| 27 | 2.4394 | 508.26 | 0.02320 | 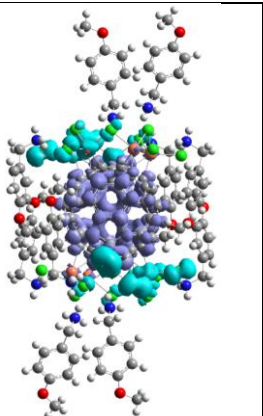  | H-6 → L+1 35.1%,<br>H-10 → L 25.9%,<br>H-6 → L+2 14.1%,<br>H-4 → L+2 6.7% |
| 29 | 2.4615 | 503.69 | 0.04920 |  | H-6 → L+2 38.3%,<br>H-12 → L 14.9%,<br>H-9 → L 12.2%,<br>H-10 → L 8.7%    |

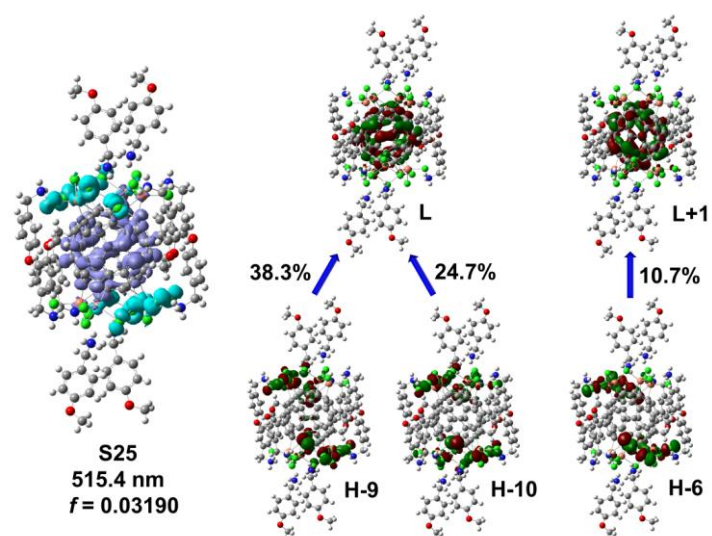

(a)

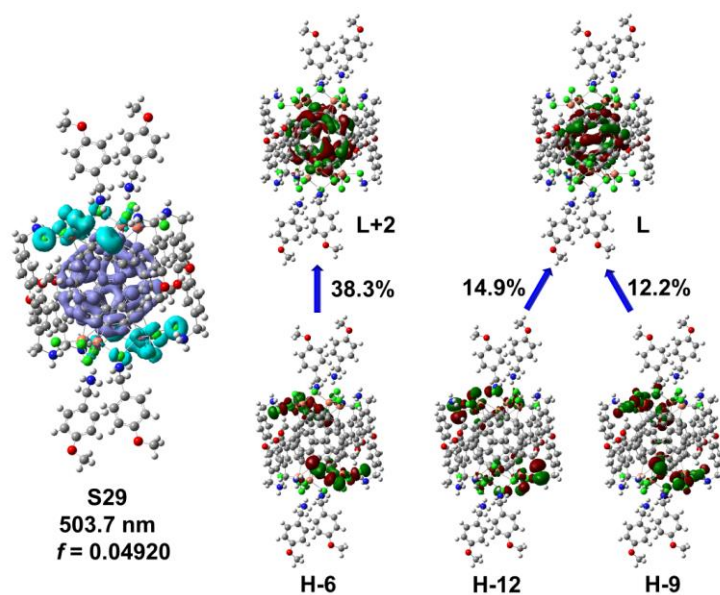

**Fig. S8** The calculated photophysical properties of the complex **1** for S25 and S29 states. Left: EDD maps (density transferring from the parts in cyan to purple) of the excited states. Right: spatial plots of the involved molecular orbitals with dominant contributions (H: HOMO, L: LUMO, isovalue = 0.02).

**Table S8** The calculated atom/fragment contributions (%) of Cu, Cl and C<sub>60</sub> for the selected frontier orbitals of complex **1**.

| No.  | Cu     | Cl     | C <sub>60</sub> |
|------|--------|--------|-----------------|
| L+2  | 12.247 | 5.185  | 81.320          |
| L+1  | 12.530 | 5.558  | 80.415          |
| L    | 12.417 | 4.464  | 81.072          |
| H    | 26.803 | 25.297 | 46.140          |
| H-1  | 25.494 | 23.903 | 49.163          |
| H-2  | 31.258 | 33.284 | 34.466          |
| H-3  | 39.864 | 41.968 | 16.288          |
| H-4  | 38.134 | 51.243 | 9.361           |
| H-5  | 31.045 | 32.401 | 35.319          |
| H-6  | 37.494 | 51.367 | 9.557           |
| H-7  | 3.185  | 3.223  | 88.896          |
| H-8  | 31.288 | 49.674 | 16.732          |
| H-9  | 37.690 | 43.938 | 17.021          |
| H-10 | 35.960 | 51.208 | 10.040          |
| H-11 | 23.366 | 50.190 | 24.390          |
| H-12 | 27.785 | 60.554 | 9.518           |
| H-13 | 37.588 | 47.272 | 12.751          |
| H-14 | 31.377 | 49.412 | 15.512          |



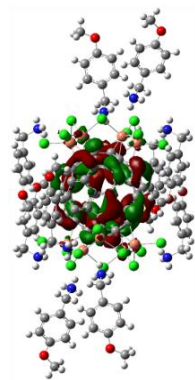

(a) L+2

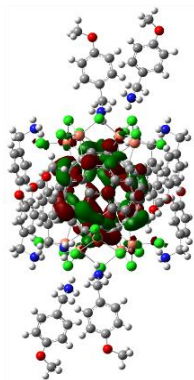

(b) L+1

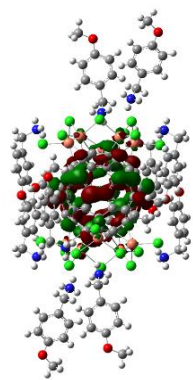

(c) L

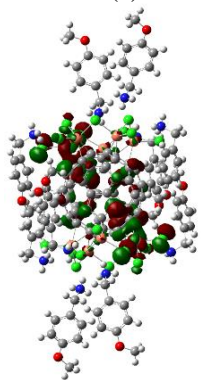

(d) H

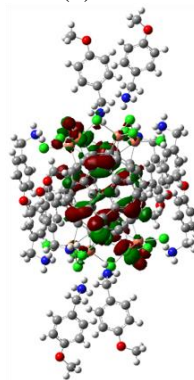

(e) H-1

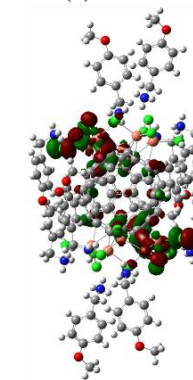

(f) H-2

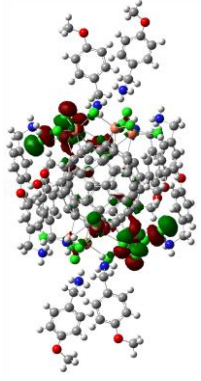

(g) H-3

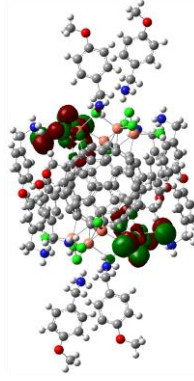

(h) H-4

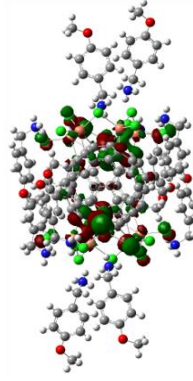

(i) H-5

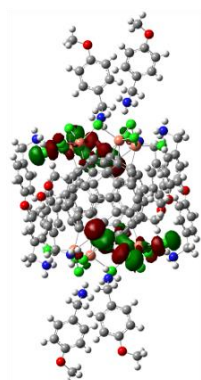

(j) H-6

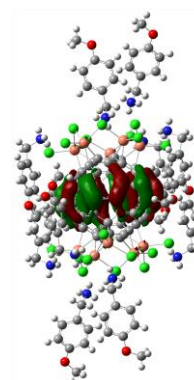

(k) H-7

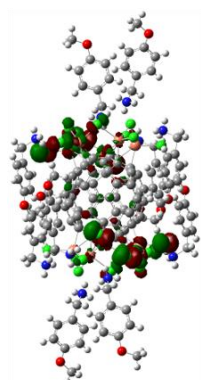

(l) H-8

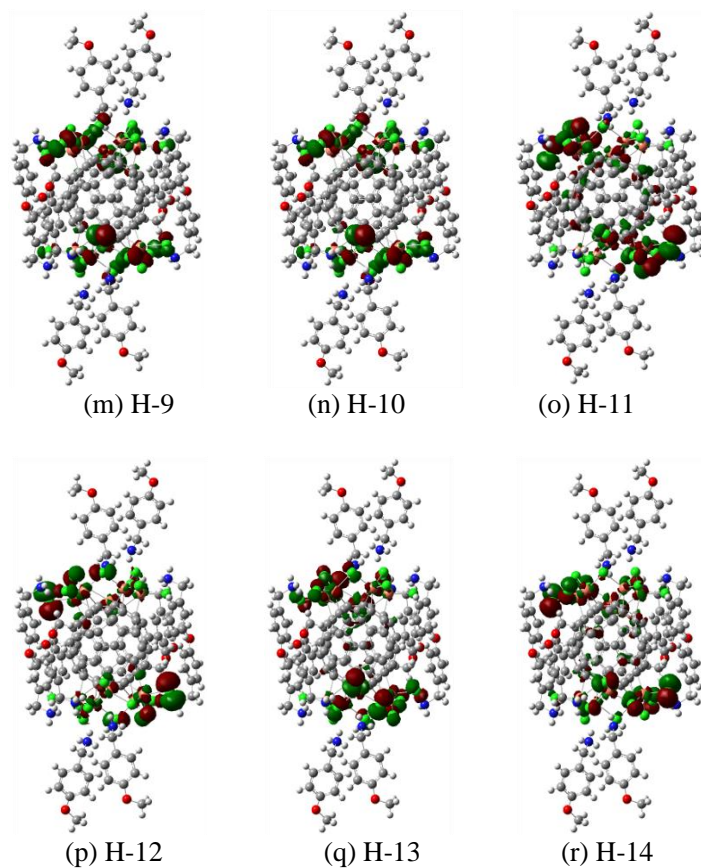

**Fig. S9** The contour of HOMO and LUMO for complex **1** (isovalue = 0.02).

**Table S9** The calculated electron density difference (EDD) and the orbital transitions of the vertical singlet excited for complex **2** (isovalue = 0.02).

| No. | E(eV)  | $\lambda$ (nm) | $f$     | EDD | Major transitions and contributions<br>(H = HOMO, L = LUMO)                                                                  |
|-----|--------|----------------|---------|-----|------------------------------------------------------------------------------------------------------------------------------|
| 1   | 1.9615 | 632.09         | 0.00000 |     | H $\rightarrow$ L 94.3%                                                                                                      |
| 23  | 2.8604 | 433.45         | 0.09760 |     | H-4 $\rightarrow$ L+2 37.3%,<br>H-11 $\rightarrow$ L+1 15.9%,<br>H-14 $\rightarrow$ L+1 8.9%,<br>H-16 $\rightarrow$ L+1 5.2% |



|    |        |        |         |                                                                                     |                                                                                                                                  |
|----|--------|--------|---------|-------------------------------------------------------------------------------------|----------------------------------------------------------------------------------------------------------------------------------|
| 24 | 2.8728 | 431.58 | 0.04860 | 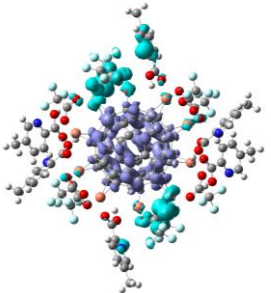   | <p>H-11 → L+1 19.5%,<br/> H-4 → L+2 19.1%,<br/> H-14 → L+1 10.3%,<br/> H-11 → L 8.4%,<br/> H-5 → L+2 5.7%,<br/> H-6 → L 5.5%</p> |
| 28 | 2.9219 | 424.33 | 0.01630 |    | <p>H-7 → L 39.8%,<br/> H-5 → L+2 11.5%,<br/> H-9 → L 9.1%,<br/> H-13 → L 7.2%,<br/> H-8 → L+2 6.1%</p>                           |
| 29 | 2.9294 | 423.24 | 0.07460 |   | <p>H-11 → L 21.9%,<br/> H-14 → L 12.9%,<br/> H-5 → L+2 11.1%,<br/> H-11 → L+1 7.0%,<br/> H-4 → L+2 6.3%,<br/> H-8 → L+2 5.4%</p> |
| 30 | 2.9390 | 421.86 | 0.11810 |  | <p>H-5 → L+2 24.8%,<br/> H-11 → L 10.8%,<br/> H-14 → L 9.3%,<br/> H-6 → L+1 8.7%,<br/> H-13 → L 5.9%</p>                         |

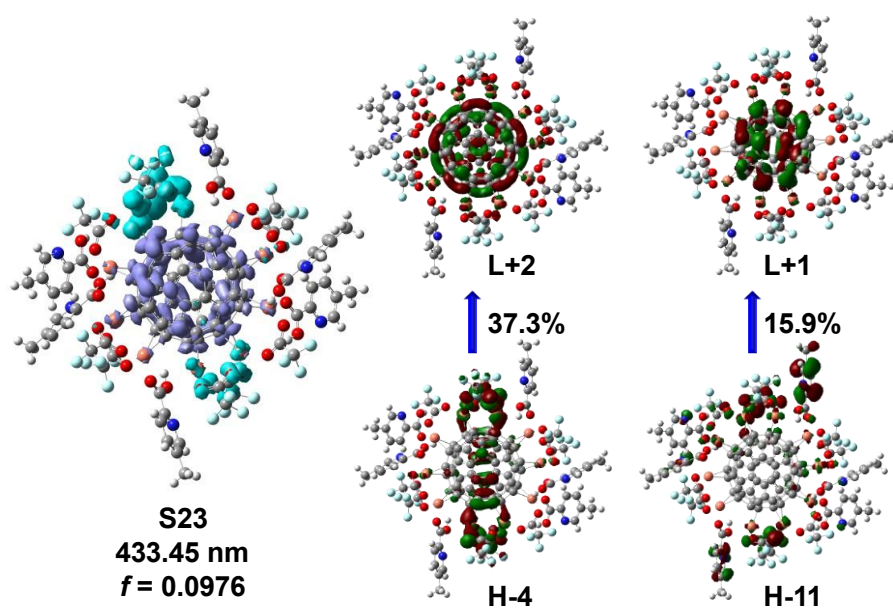

(a)

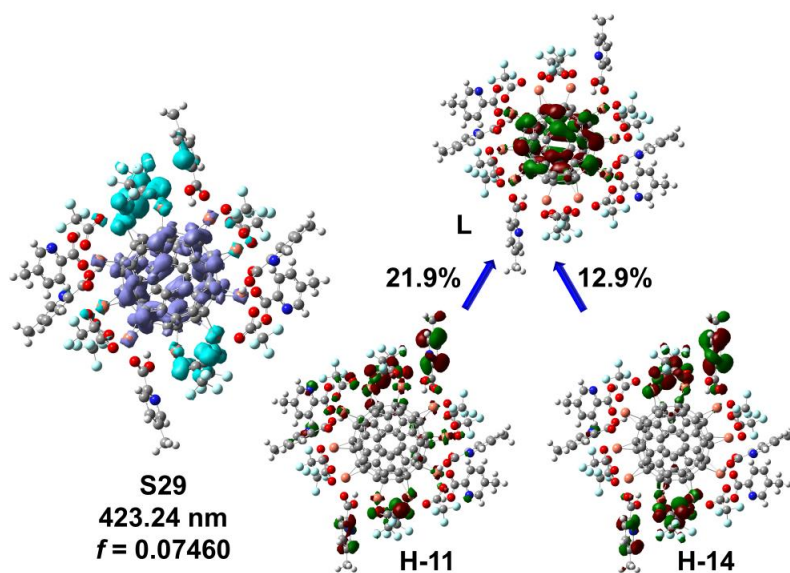

(b)

**Fig. S10** The calculated photophysical properties of complex **2** for S23 (a) and S29 (b) states. Left: EDD maps (density transferring from the parts in cyan to purple) of the excited states. Right: spatial plots of the involved molecular orbitals with dominant contributions (H: HOMO, L: LUMO, isovalue = 0.02).

**Table S10** The calculated atom/fragment contributions (%) of Cu, N, O and C<sub>60</sub> for the selected frontier orbitals of complex **2**.

| No. | Cu     | N     | O      | C <sub>60</sub> |
|-----|--------|-------|--------|-----------------|
| L+2 | 25.062 | 0.018 | 5.998  | 66.827          |
| L+1 | 7.922  | 0.011 | 1.868  | 89.468          |
| L   | 8.386  | 0.021 | 2.084  | 88.233          |
| H   | 19.436 | 0.048 | 10.670 | 65.723          |
| H-1 | 19.187 | 0.226 | 7.736  | 70.261          |
| H-2 | 13.661 | 0.338 | 7.279  | 76.310          |

|      |        |        |        |        |
|------|--------|--------|--------|--------|
| H-3  | 11.189 | 0.230  | 5.466  | 81.071 |
| H-4  | 27.713 | 0.140  | 28.452 | 30.146 |
| H-5  | 31.818 | 0.949  | 24.382 | 32.098 |
| H-6  | 5.157  | 43.978 | 10.080 | 5.493  |
| H-7  | 6.419  | 42.228 | 10.514 | 6.916  |
| H-8  | 23.881 | 7.627  | 35.261 | 15.770 |
| H-9  | 21.383 | 20.634 | 15.952 | 25.283 |
| H-10 | 1.948  | 55.993 | 5.048  | 2.114  |
| H-11 | 16.555 | 5.951  | 30.415 | 10.837 |
| H-12 | 5.143  | 48.961 | 8.021  | 4.730  |
| H-13 | 18.755 | 13.488 | 20.261 | 15.106 |
| H-14 | 16.656 | 4.155  | 27.090 | 6.822  |

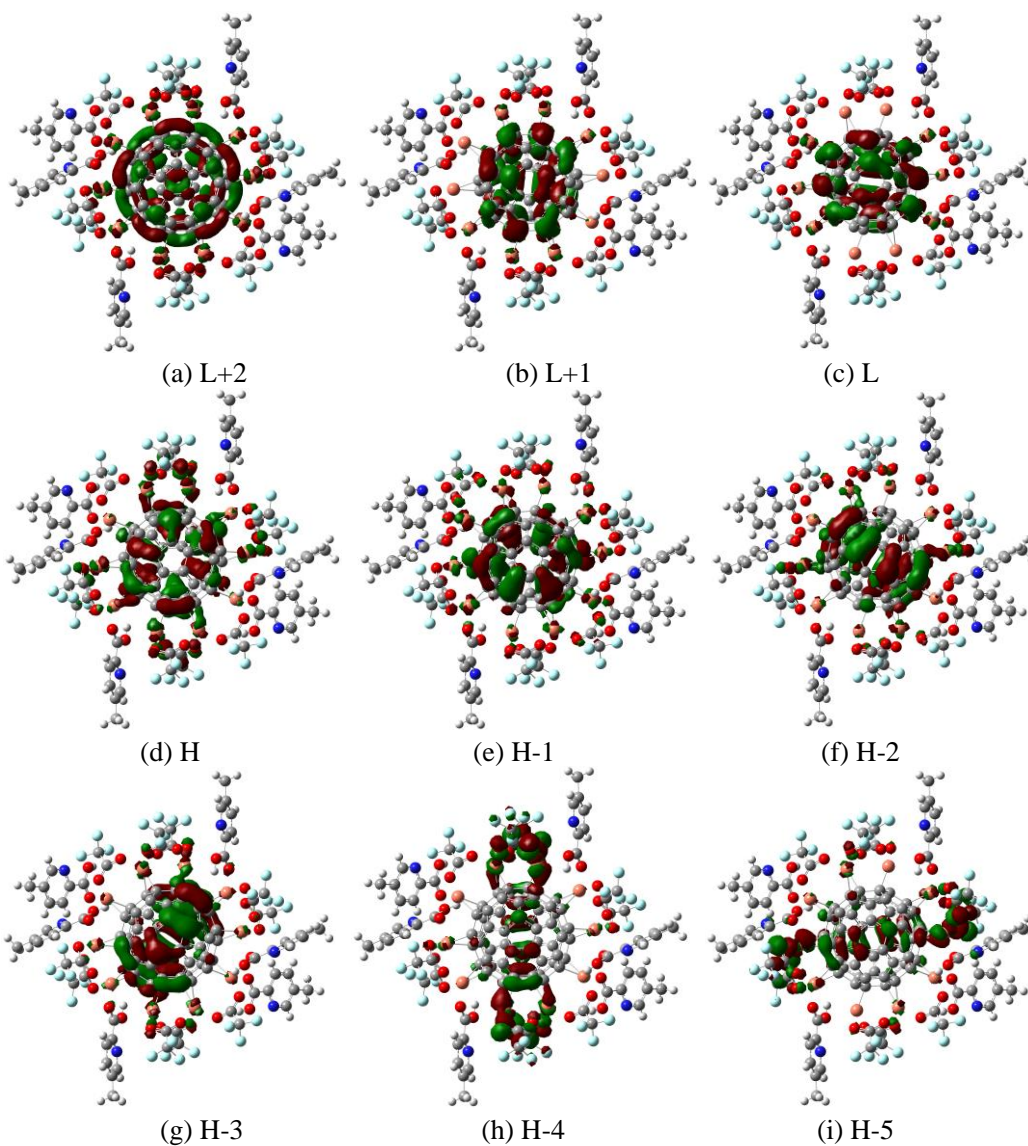

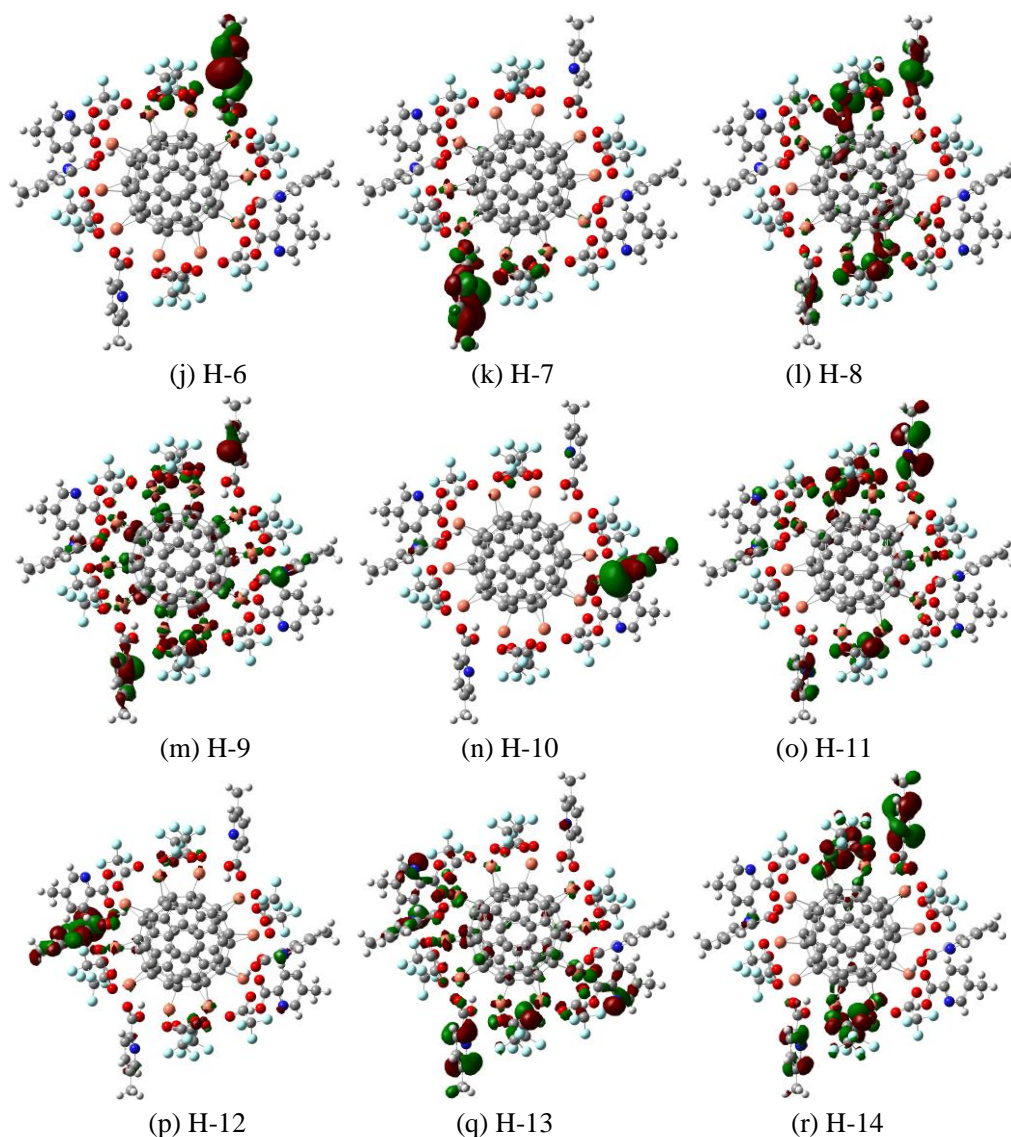

**Fig. S11** The contour of HOMO and LUMO for complex **2** (isovalue = 0.02).

#### 4. References

- [1] a) G. M. Sheldrick, A short history of SHELX. *Acta Cryst.*, **2008**, *A64*: 112–122. b) M. Sheldrick, Crystal structure refinement with SHELXL, *Acta Crystallogr., Sect. C: Cryst. Struct. Commun.*, 2015, **71**, 3-8.
- [2] O. V. Dolomanov, L. J. Bourhis, R. J. Gildea, J. A. K. Howard, H. Puschmann. OLEX2: a complete structure solution, refinement and analysis program. *J. Appl. Cryst.*, **2009**, *42*, 339–341.
- [3] M. J. Frisch, *et al.*, Gaussian 16, Gaussian, Inc., Wallingford CT, 2016.
- [4] a) J. P. Perdew, K. Burke and M. Ernzerhof, Generalized Gradient Approximation Made Simple, *Phys. Rev. Lett.*, 1996, **77**, 3865-3868. b) C. Adamo and V. Barone, Inexpensive and accurate predictions of optical excitations in transition-metal complexes: the TDDFT/PBE0 route, *Theor. Chem. Acc.*, 2000, **105**, 169-172.
- [5] P. J. Hay and W. R. J. Wadt, Ab *initio* effective core potentials for molecular calculations. Potentials for the transition metal atoms Sc to Hg., *J. Chem. Phys.*, 1985, **82**, 270-283.

- [6] a) P. J. Hay and W. R. Wadt, Ab initio effective core potentials for molecular calculations. Potentials for K to Au including the outermost core orbitals, *The Journal of Chemical Physics*, 1985, **82**, 299-310. b) R. C. Binning Jr and L. A. Curtiss, Compact contracted basis sets for third-row atoms: Ga–Kr, *J. Comput. Chem.*, 1990, **11**, 1206-1216.
- [7] T. Lu and F. Chen, Multiwfn: A multifunctional wavefunction analyzer, *J. Comput. Chem.*, 2012, **33**, 580-592.
